# Supplementary material for: Taxonomy-aware feature engineering for microbiome classification
Source: PubMed Central journal article supplement (PMC6003080; doi:10.1186/s12859-018-2205-3), 2018-06-15
Supplement: 12859_2018_2205_MOESM1_ESM.pdf [file 12859_2018_2205_MOESM1_ESM.pdf]

# Additional file 1

## 1 Additional Figures

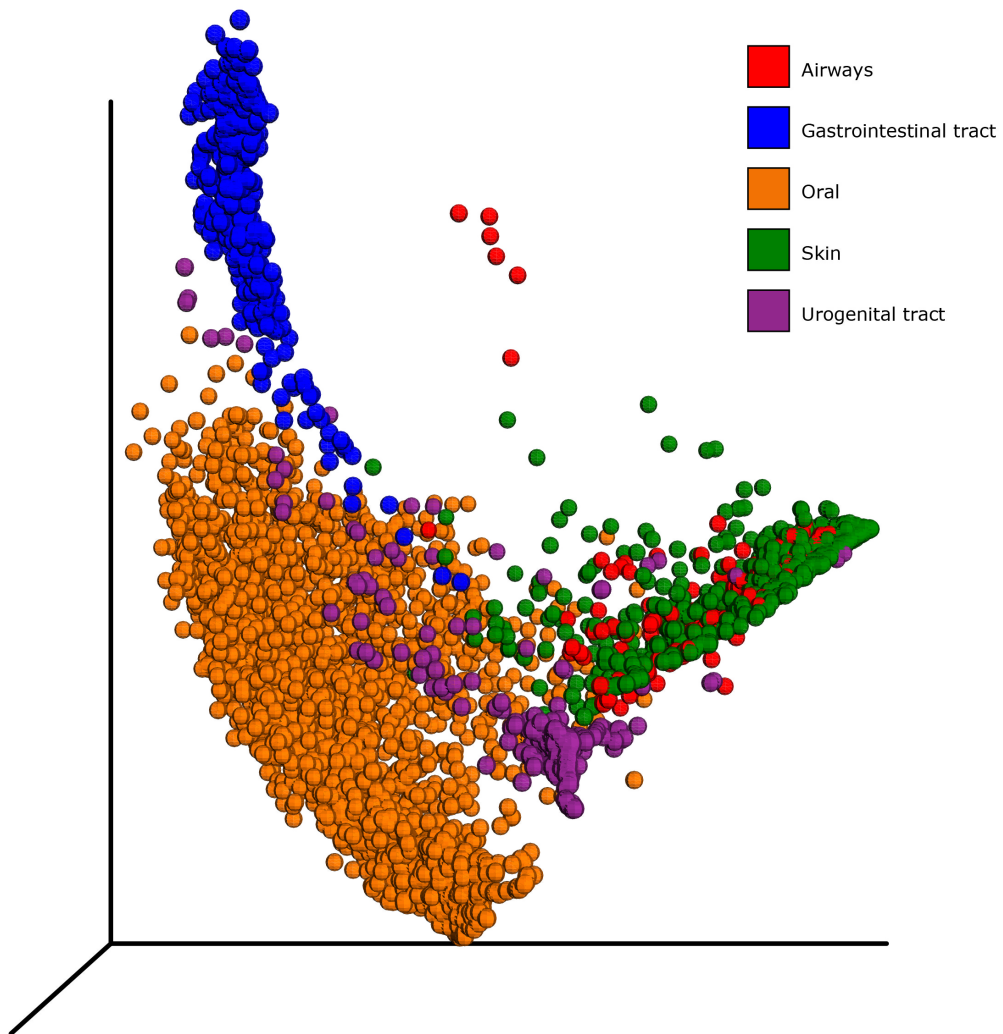

Figure S1: The PCoA plot of The Human Microbiome Project Consortium (2012) dataset, which is generated via the *beta\_diversity\_through\_plots.py* script available by QIIME.

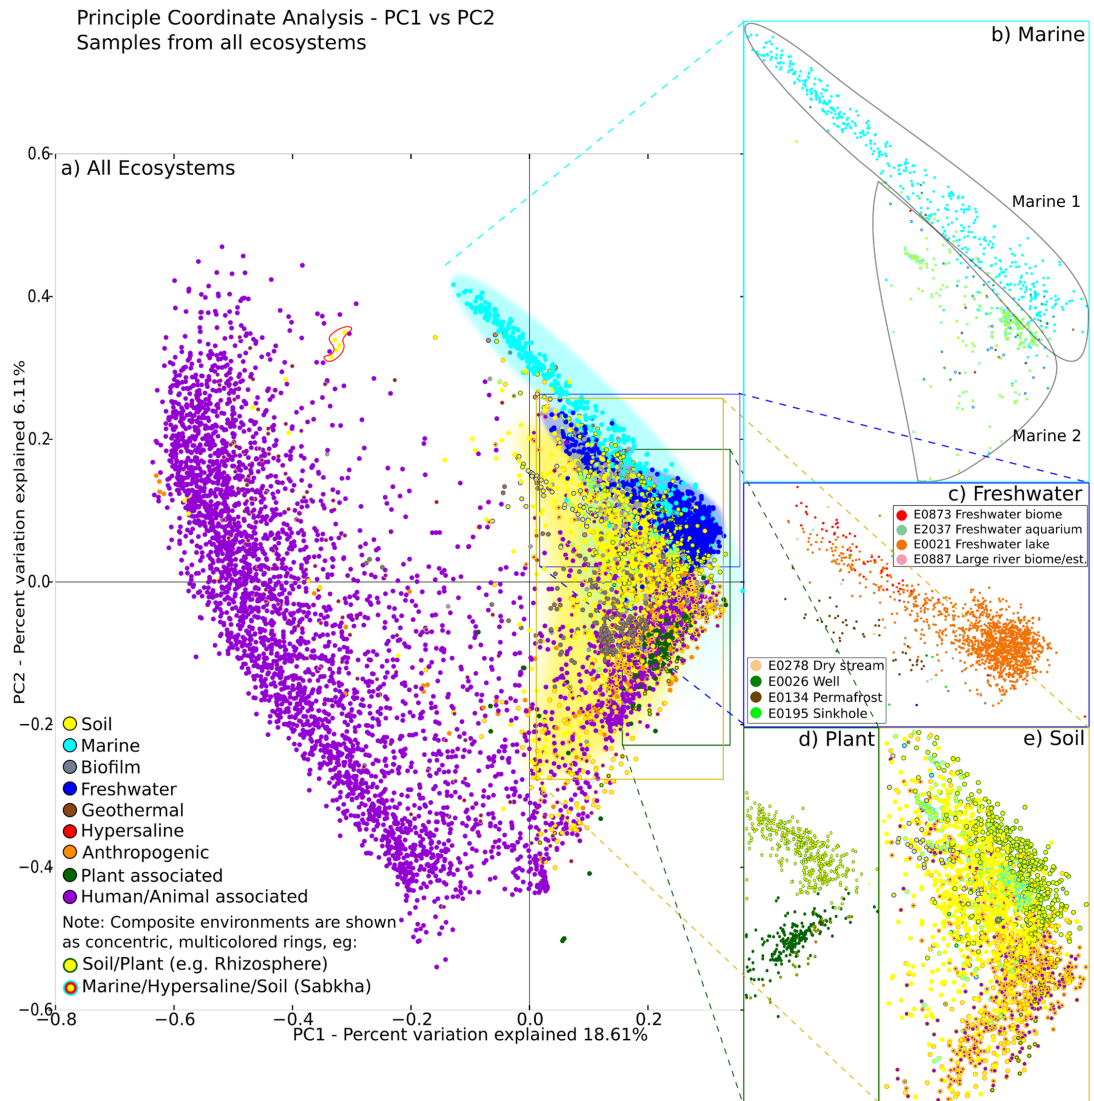

Figure S2: The PCoA plot provided in the Meta-analysis of environmental microbiomes conducted by Henschel *et al.* (2015).

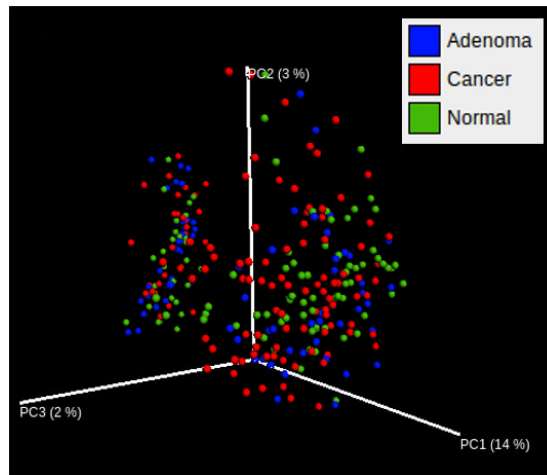

Figure S3: The PCoA plot of the combined CRC dataset.

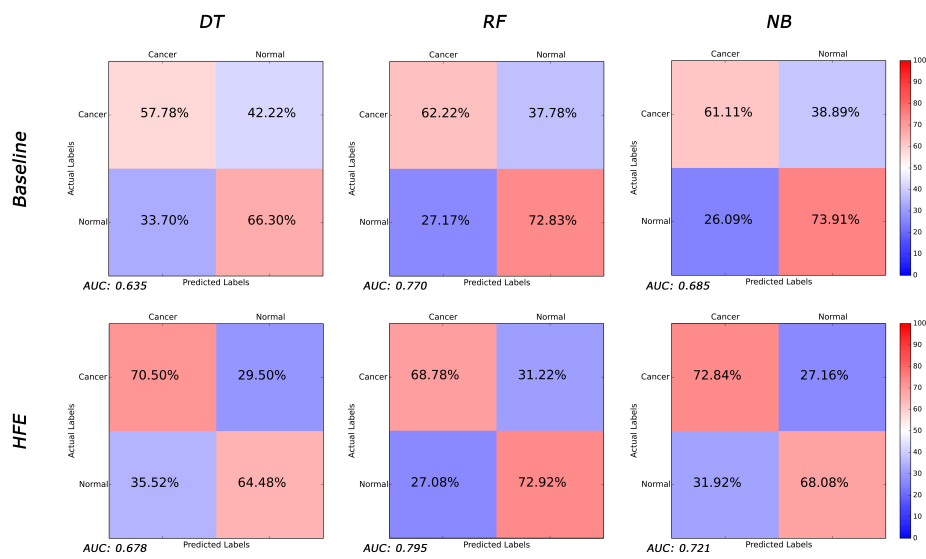

Figure S4: Comparison between the baseline and HFE confusion matrices when applied on CRC1 dataset (Zeller *et al.*, 2014) for Cancer vs. Normal classification.

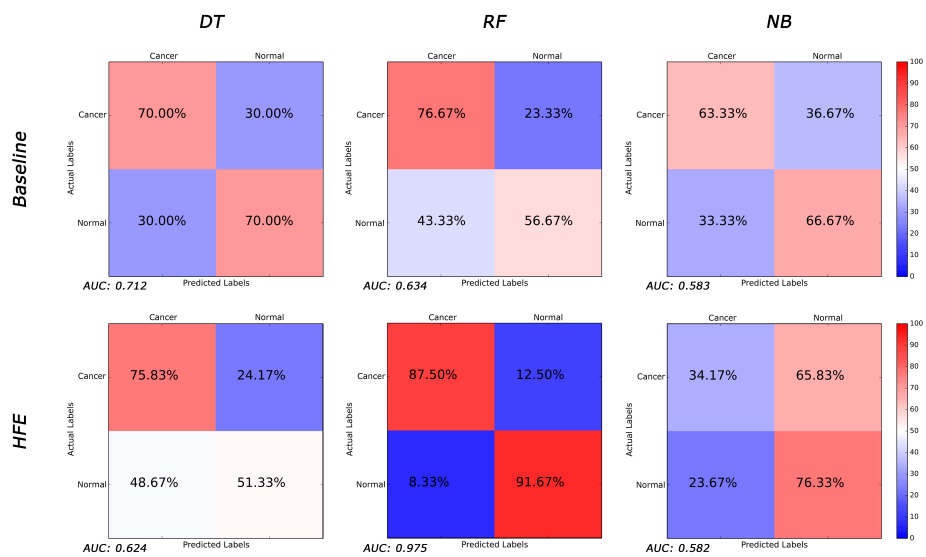

Figure S5: Comparison between the baseline and HFE confusion matrices when applied on CRC2 dataset (Zackular *et al.*, 2014) for Cancer vs. Normal classification.

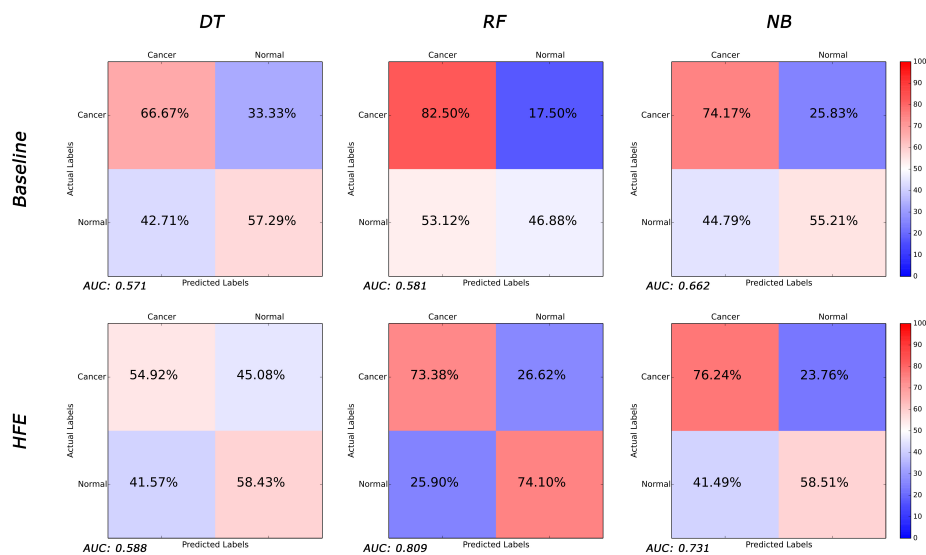

Figure S6: Comparison between the baseline and HFE confusion matrices when applied on CRC1+2 dataset for Cancer vs. Normal classification.



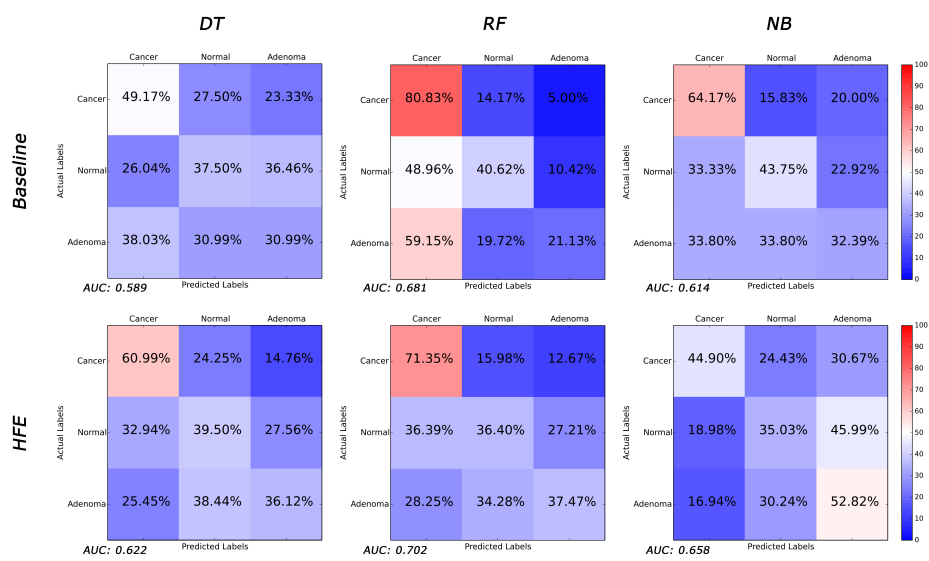

Figure S7: Comparison between the baseline and HFE confusion matrices when applied on CRC1+2 dataset for Cancer vs. Normal vs. Adenoma classification.

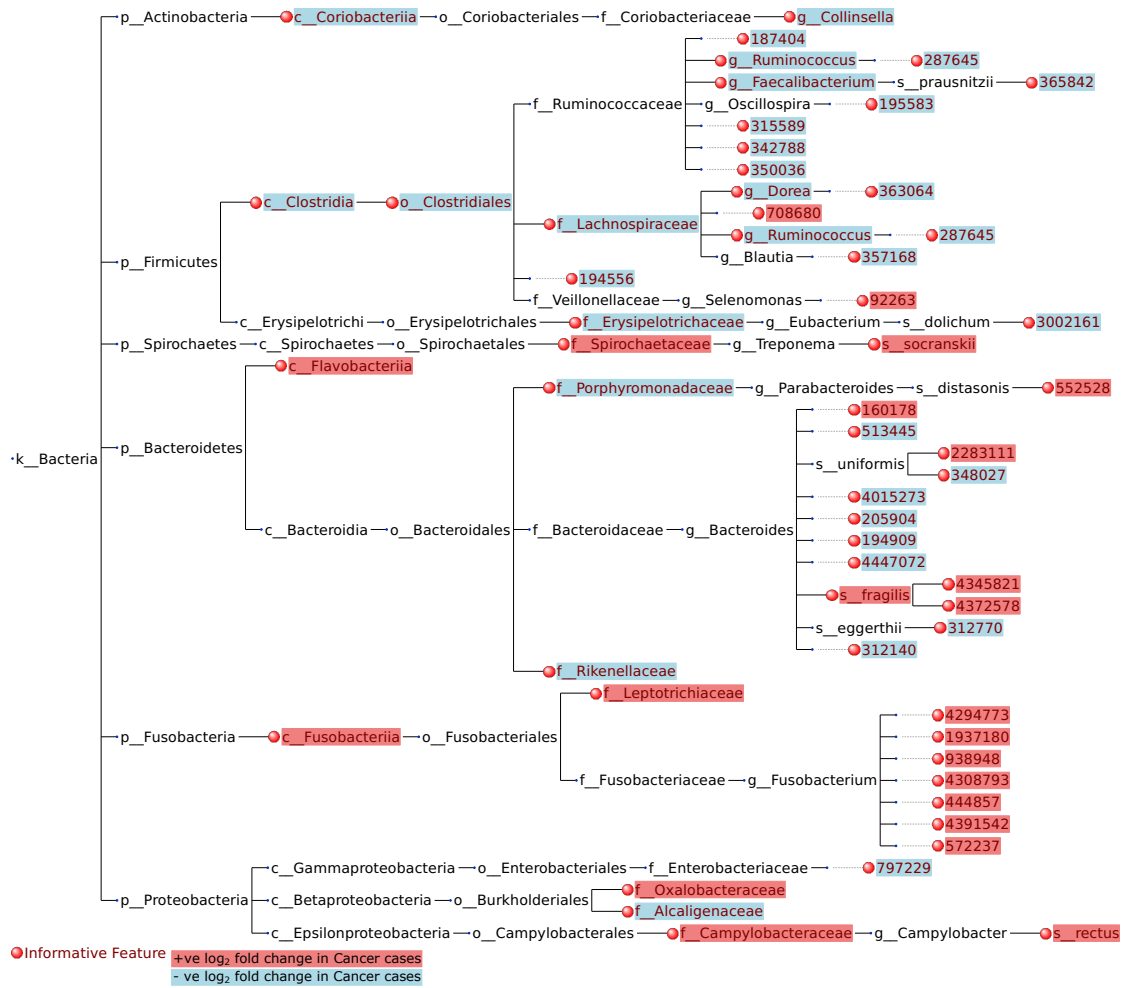

Figure S8: The taxonomic tree of all the informative features extracted by the HFE method for Cancer vs. Normal classification with respect to the dataset provided by Kostic *et al.* (2012).

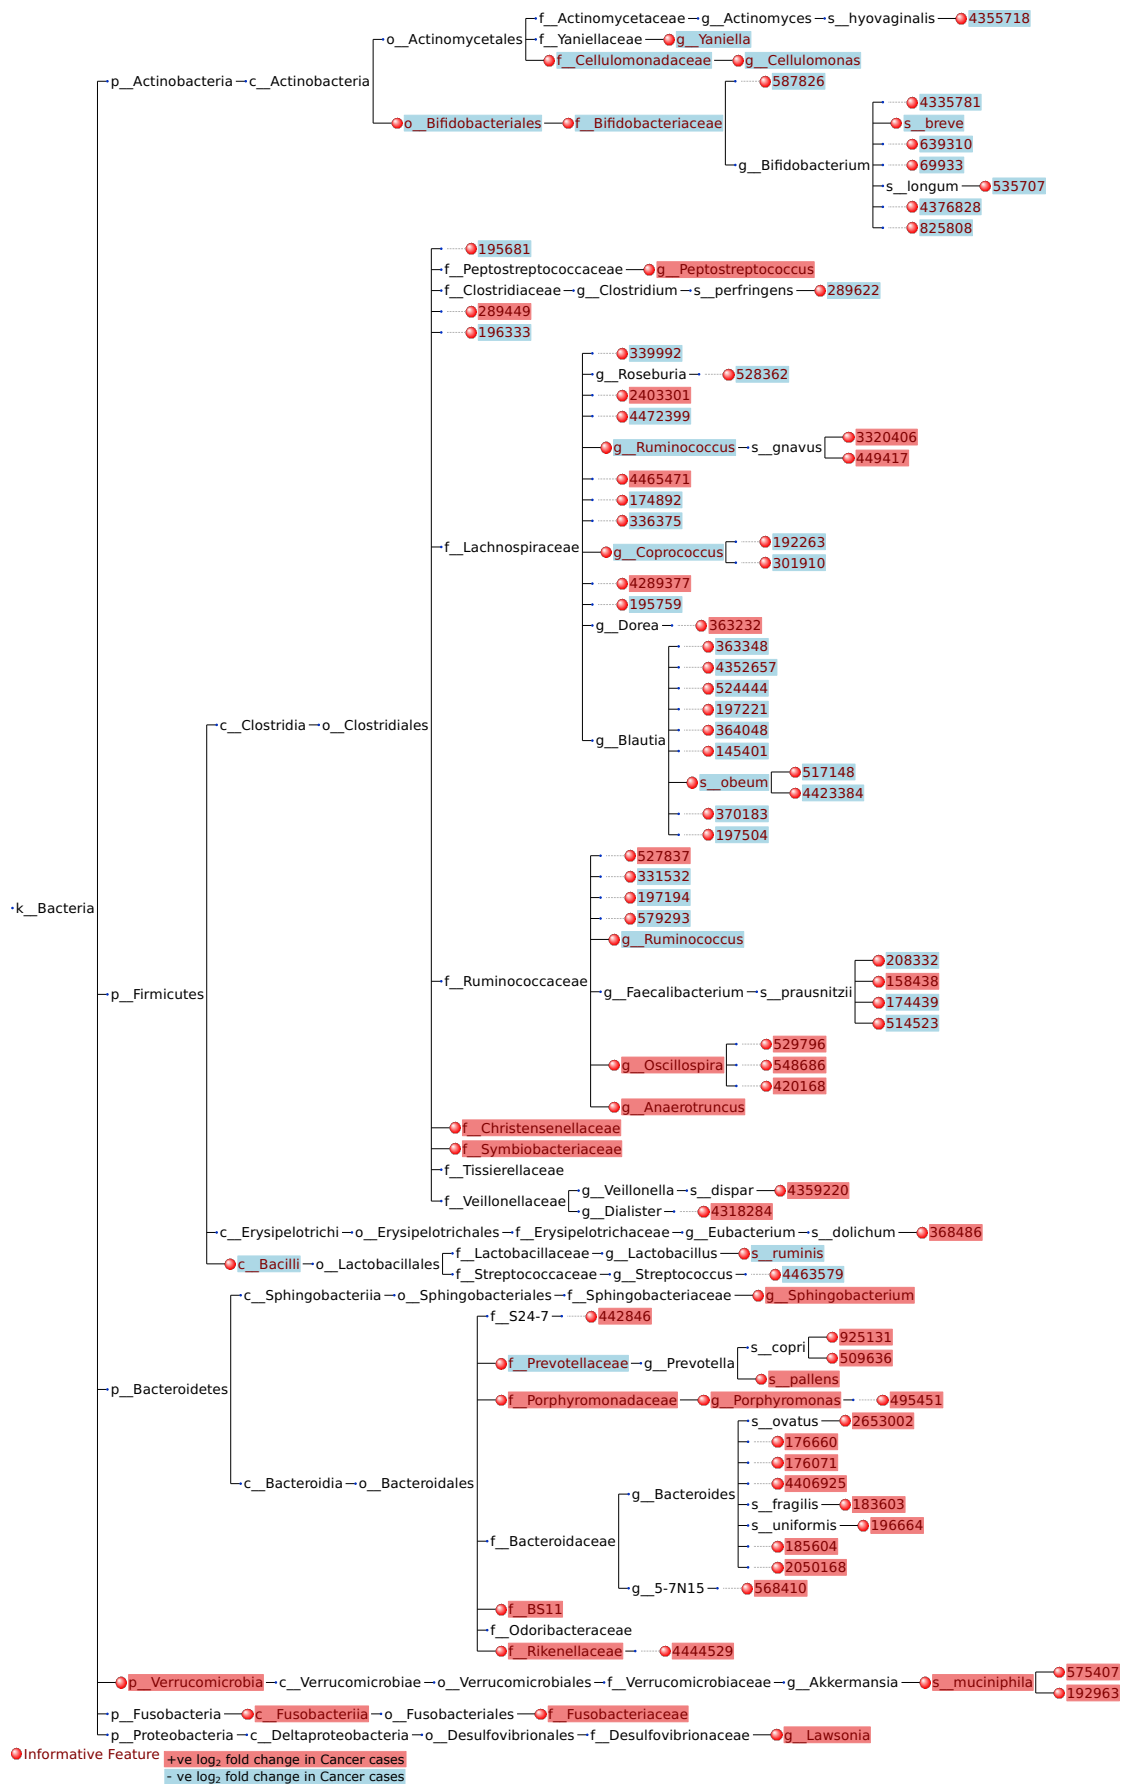

Figure S9: The taxonomic tree of all the informative features extracted by the HFE method for Cancer vs. Normal classification with respect to CRC1 dataset (Zeller *et al.*, 2014).

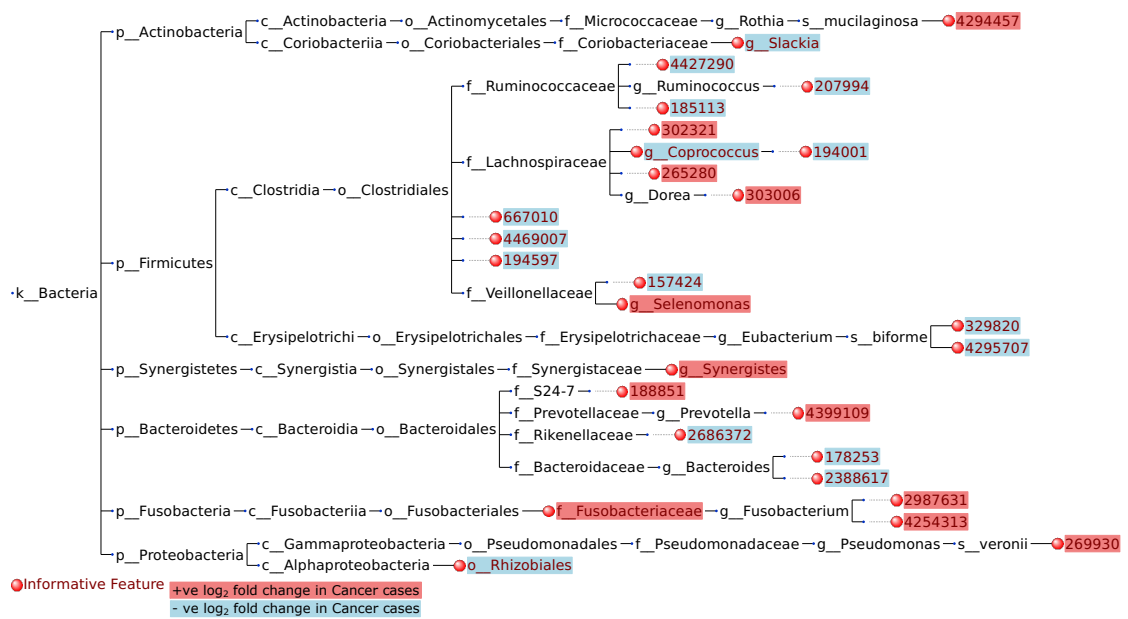

Figure S10: The taxonomic tree of all the informative features extracted by the HFE method for Cancer vs. Normal classification with respect to CRC2 dataset (Zackular *et al.*, 2014).

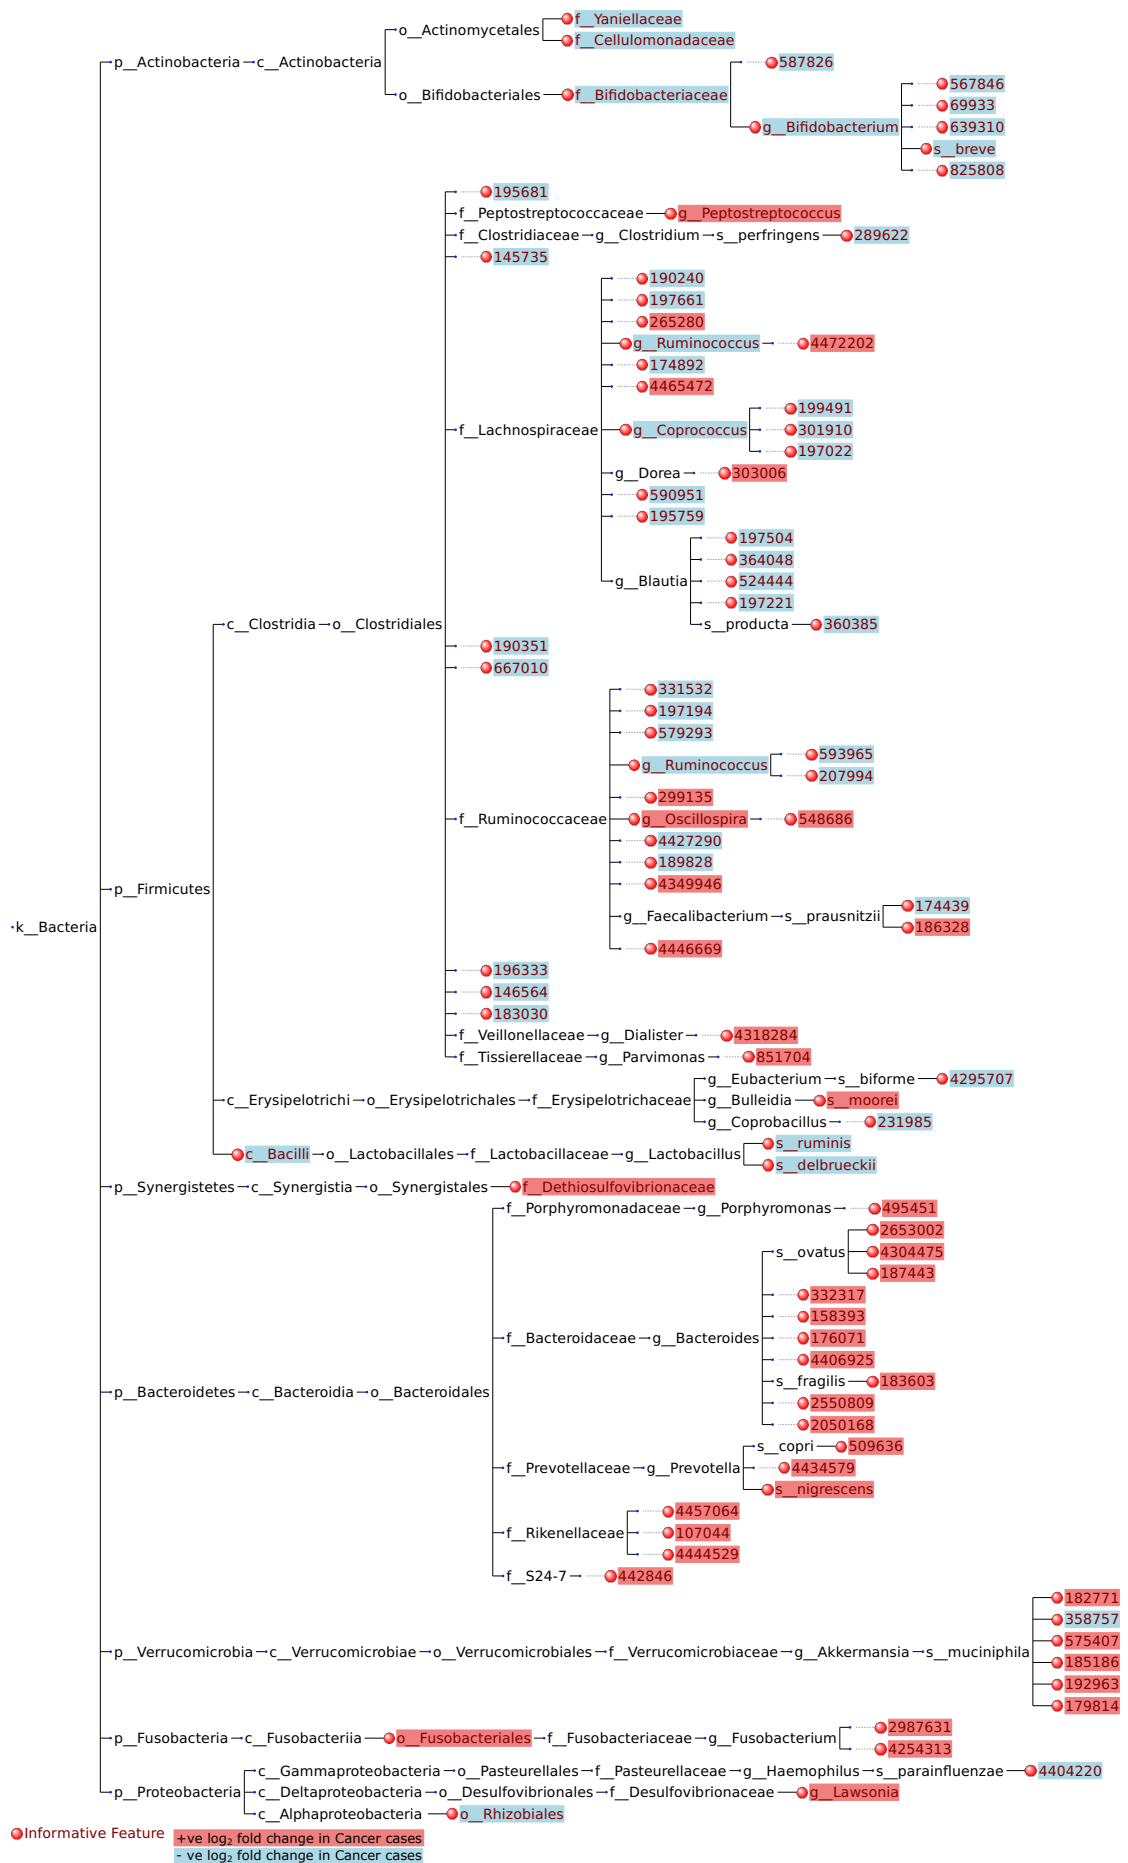

Figure S11: The taxonomic tree of all the informative features extracted by the HFE method for Cancer vs. Normal classification with respect to CRC1+2 dataset.

## 2 Supplementary Tables

Table S1: The cross-validation results of the proposed pipeline when applied for human body site prediction and environment prediction, in terms of AUC.

| <b>ML</b>        | <b>Human Body Site Prediction</b> |            | <b>Environment Prediction</b> |            |
|------------------|-----------------------------------|------------|-------------------------------|------------|
|                  | <b>BL</b>                         | <b>HFE</b> | <b>BL</b>                     | <b>HFE</b> |
| <b>DT</b>        | 0.992                             | 0.985      | 0.973                         | 0.960      |
| <b>RF</b>        | 0.999                             | 0.999      | 0.999                         | 0.999      |
| <b>NB</b>        | 0.994                             | 0.995      | 0.903                         | 0.949      |
| <b>#Features</b> | 5,430                             | 84         | 30,860                        | 267        |

BL and HFE refer to the baseline and HFE feature sets, respectively.

## References

- Henschel, A., Anwar, M., and Manohar, V. (2015). Comprehensive meta-analysis of ontology annotated 16s rna profiles identifies beta diversity clusters of environmental bacterial communities. *PLoS Computational Biology*, **11**, 1–24.
- Kostic, A. D., Gevers, D., Pedamallu, C. S., Michaud, M., Duke, F., Earl, A. M., Ojesina, A. I., Jung, J., Bass, A. J., Tabernero, J., *et al.* (2012). Genomic analysis identifies association of fusobacterium with colorectal carcinoma. *Genome research*, **22**(2), 292–298.
- The Human Microbiome Project Consortium (2012). Structure, function and diversity of the healthy human microbiome. *Nature*, **486**, 207–214.
- Zackular, J., Rogers, M., Ruffin, M., and Schloss, P. (2014). The human gut microbiome as a screening tool for colorectal cancer. *Cancer Prevention Research*, **7**, 1112–1121.
- Zeller, G., Tap, J., Voigt, A., Sunagawa, S., Kultima, J., Costea, P., Amiot, A., Bohm, J., Brunetti, F., Habermann, N., Herczeg, R., Koch, M., Luciani, A., *et al.* (2014). Potential of fecal microbiota for early-stage detection of colorectal cancer. *Molecular Systems Biology*, **10**, 1–18.
